# Supplementary material for: The impact of cardiovascular disease on all-cause and cancer mortality: results from a 16-year follow-up of a German breast cancer case–control study
Source: PubMed Central journal article supplement (PMC10373242; doi:10.1186/s13058-023-01680-x), 2023-07-27

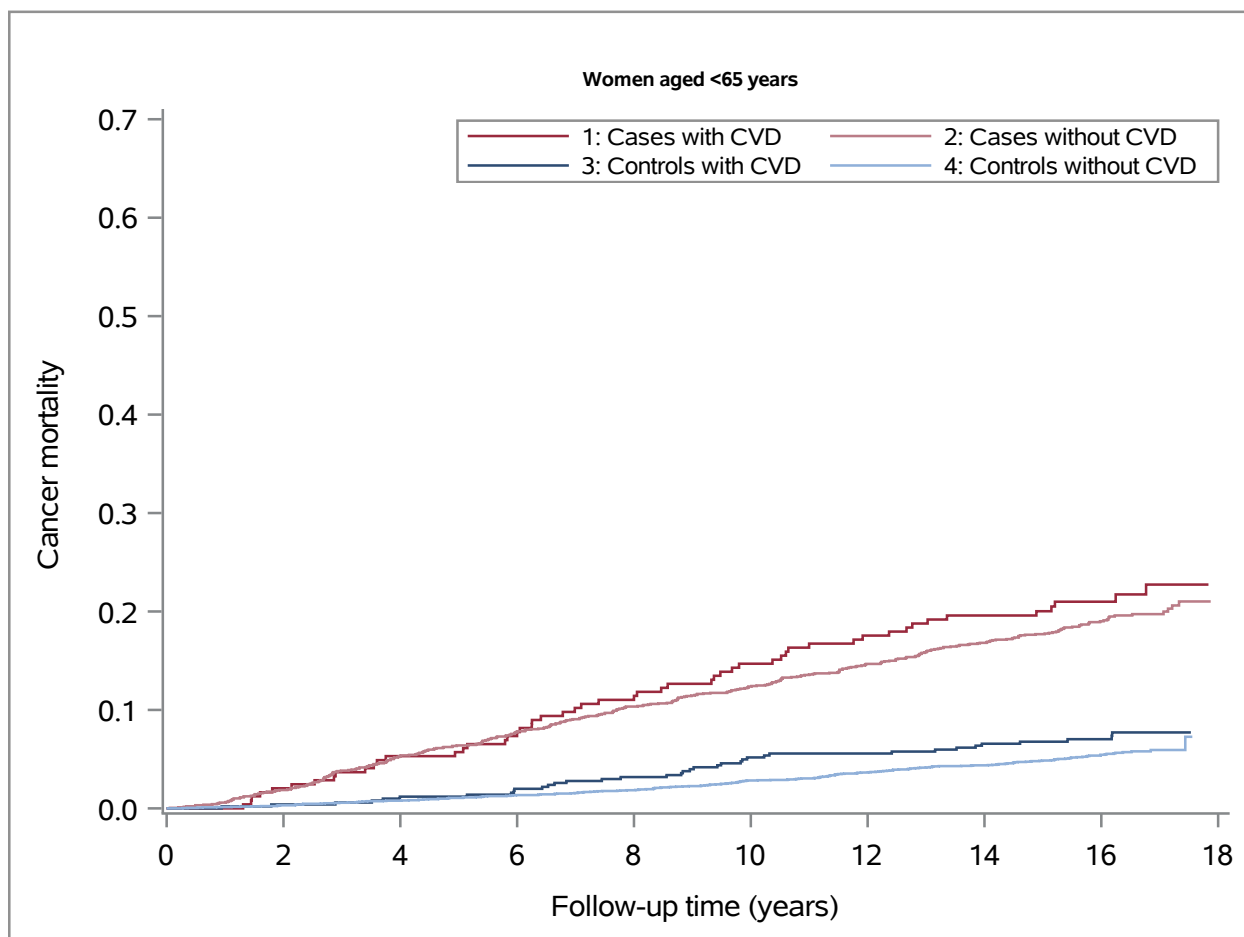

Supplement: 13058_2023_1680_MOESM2_ESM.pdf [file 13058_2023_1680_MOESM2_ESM.pdf]
