# Supplementary material for: The impact of cardiovascular disease on all-cause and cancer mortality: results from a 16-year follow-up of a German breast cancer case–control study
Source: Springer Nature journal article supplement (doi:10.1186/s13058-023-01680-x), 2023-07-27

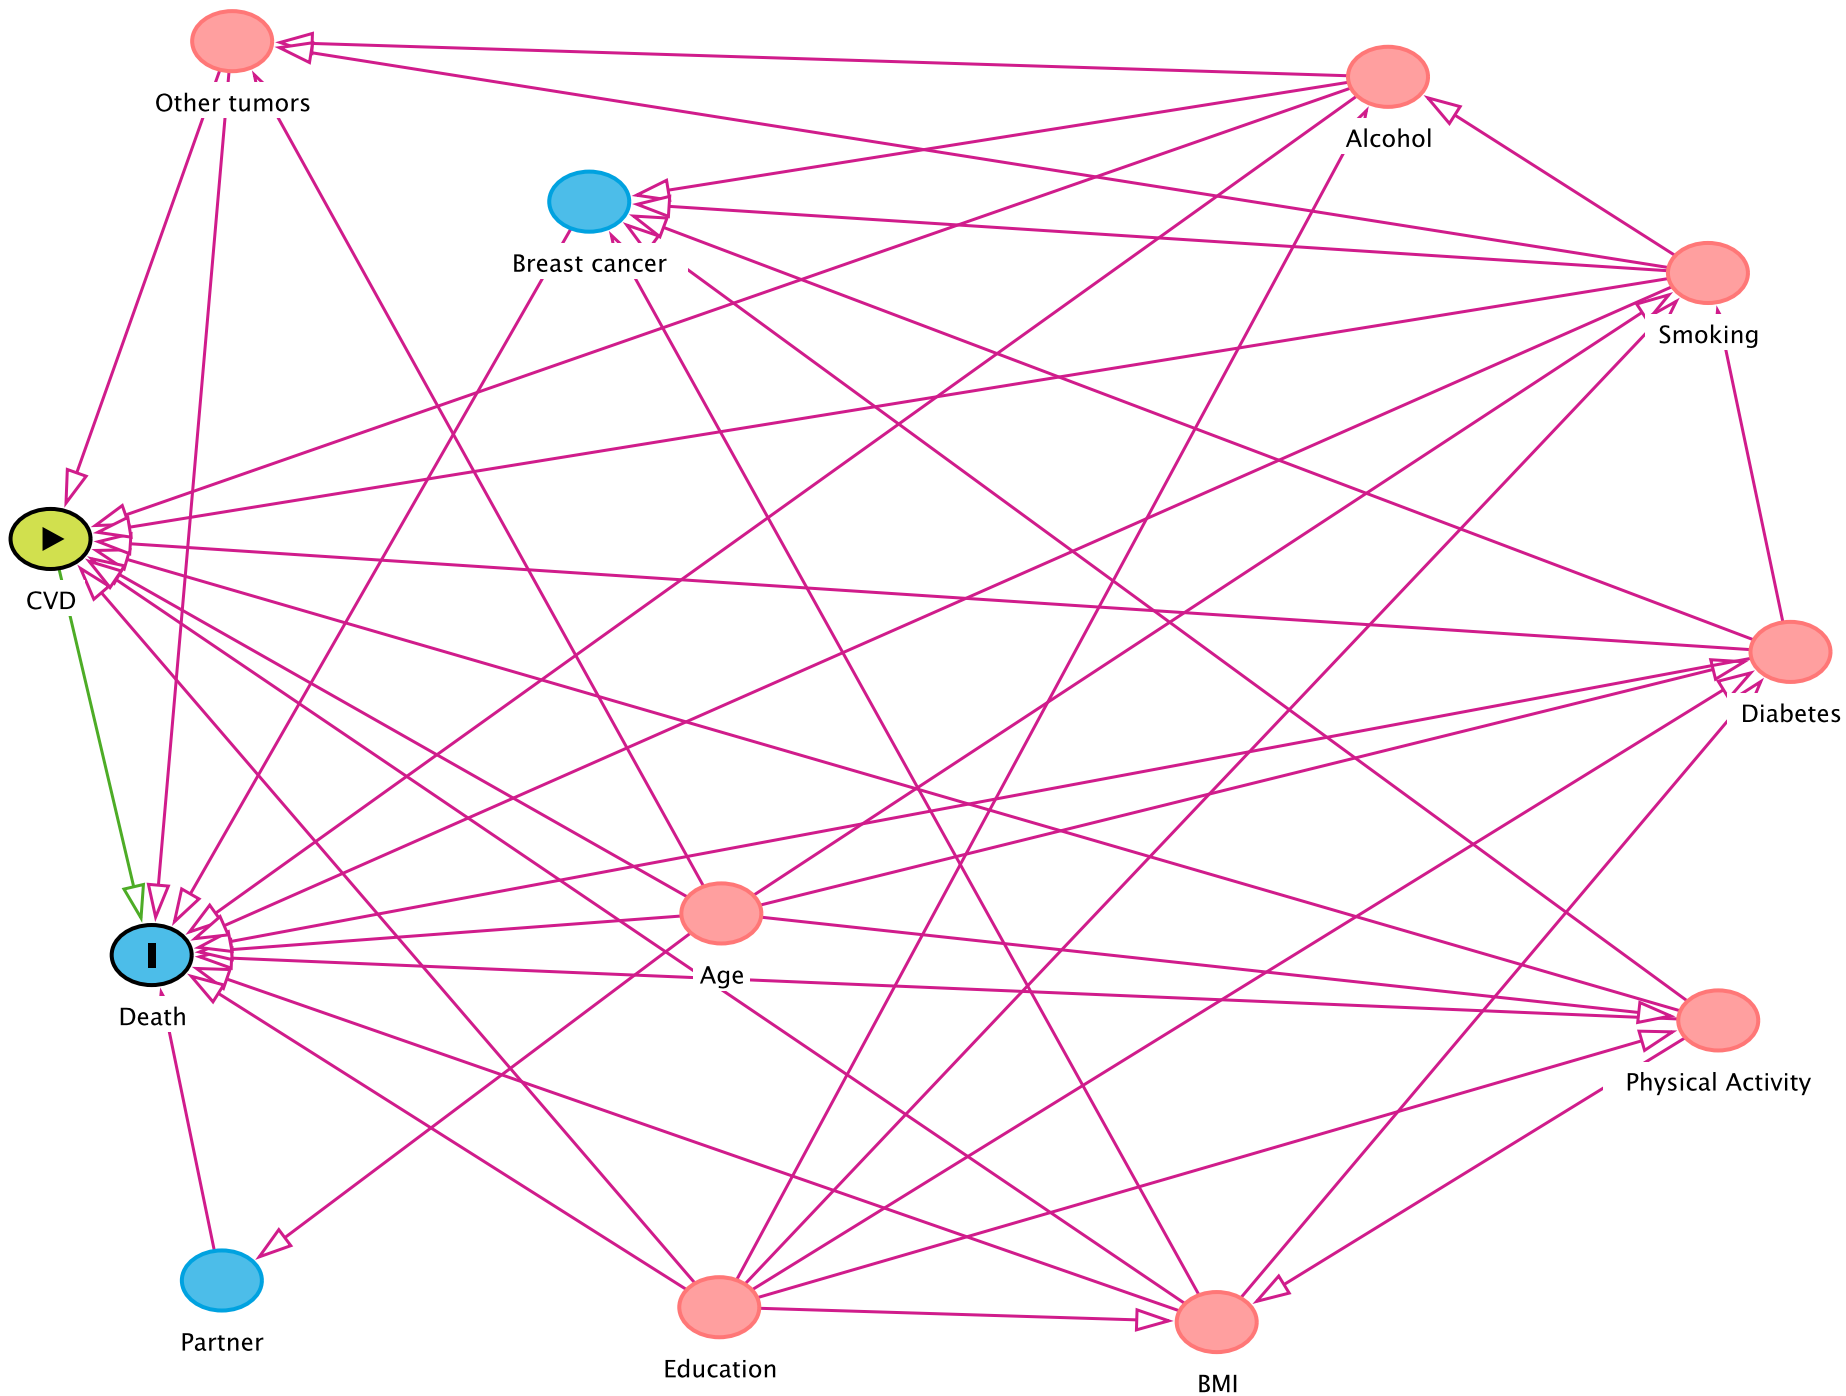

Supplement: MOESM1 [file 25854336]
